# Supplementary material for: Computational Analysis of Molnupiravir
Source: MDPI journal article supplement (doi:10.3390/ijms23031508), 2022-01-28
Supplement: s1 [file s1]

# Supplementary Materials

## Computational Analysis of Molnupiravir

Artem V. Sharov <sup>1,2</sup>, Tatyana M. Burkhanova <sup>1,2,3</sup>, Tugba Taskın Tok <sup>4,5,\*</sup>, Maria G. Babashkina <sup>6</sup> and Damir A. Safin <sup>1,2,3,\*</sup>

<sup>1</sup> «Advanced Materials for Industry and Biomedicine» Laboratory, Kurgan State University, Sovetskaya Str.63/4, 640020 Kurgan, Russia; sharow84@gmail.com (A.V.S.); t.m.burkhanova@utmn.ru (T.M.B.)

<sup>2</sup> Center for Enterprise Relations, Ural Federal University Named after the First President of Russia B.N. Yeltsin, Mira Str. 19, 620002 Ekaterinburg, Russia

<sup>3</sup> Innovation Center for Chemical and Pharmaceutical Technologies, Ural Federal University Named after the First President of Russia B.N. Yeltsin, Mira Str. 19, 620002 Ekaterinburg, Russia

<sup>4</sup> University of Tyumen, Volodarskogo Str. 6, 625003 Tyumen, Russia

<sup>5</sup> Department of Chemistry, Faculty of Arts and Sciences, University of Gaziantep, Gaziantep 27310, Turkey; ttaskin@gantep.edu.tr or taskin.tugba@gmail.com

<sup>6</sup> Department of Bioinformatics and Computational Biology, Institute of Health Sciences, University of Gaziantep, Gaziantep 27310, Turkey

<sup>7</sup> Institute of Condensed Matter and Nanosciences, Université Catholique de Louvain, Place L. Pasteur 1, 1348 Louvain-la-Neuve, Belgium; maria.babashkina@mail.ru

\* Correspondence: damir.a.safin@gmail.com

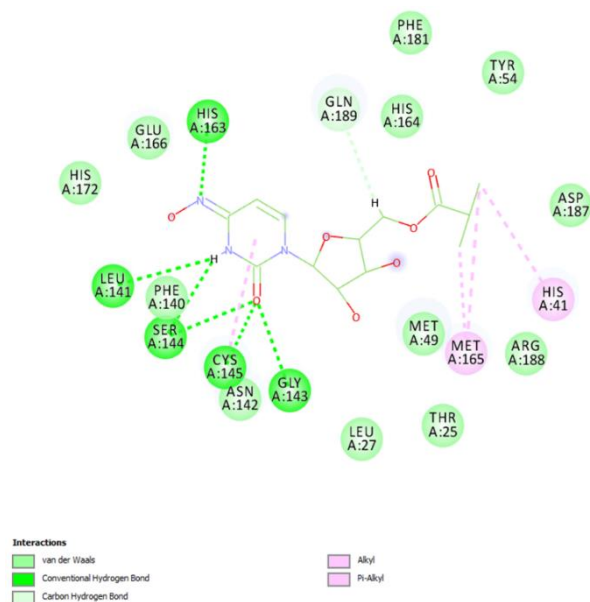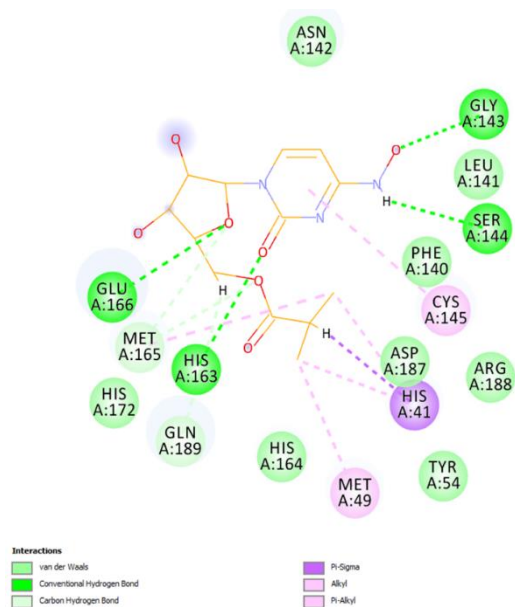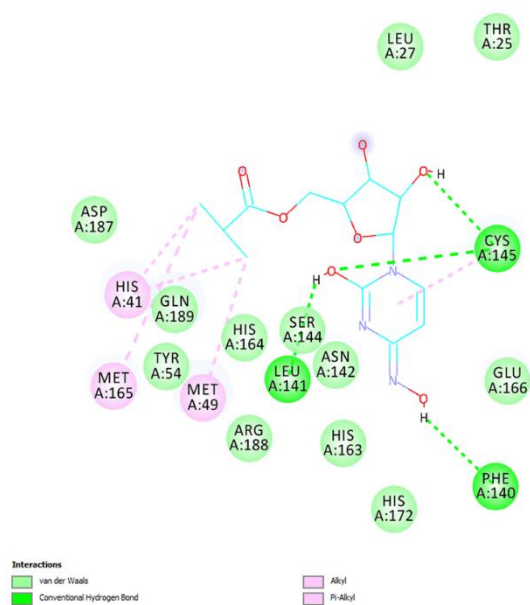

**Figure S1.** 2D views on the interaction of the keto-oxime (top), keto-hydroxylamine (middle) and hydroxyl-oxime (bottom) tautomers of molnupiravir with Mpro.

**Table S1.** Best types of interactions and distances of the keto-oxime, keto-hydroxylamine and hydroxyl-oxime tautomers of molnupiravir with RdRp-RTP and Nonstructural protein 3 (Nsp3\_range 207–379-MES).

| Interactions: RdRp-RTP-keto-oxime                       | Distance Å | Bonding       | Bonding Types              | Binding site of enzyme | Binding site of ligand  |
|---------------------------------------------------------|------------|---------------|----------------------------|------------------------|-------------------------|
| A:LYS593:HN - d:Keto-oxime:O                            | 2.2011     | Hydrogen Bond | Conventional Hydrogen Bond | A:LYS593:HN            | d:Keto-oxime:O          |
| T:A13:H3 - d:Keto-oxime:O                               | 2.8657     | Hydrogen Bond | Conventional Hydrogen Bond | T:A13:H3               | d:Keto-oxime:O          |
| T:A14:HO2' - d:Keto-oxime:O                             | 2.5678     | Hydrogen Bond | Conventional Hydrogen Bond | T:A14:HO2'             | d:Keto-oxime:O          |
| d:Keto-oxime:H - P:U18:O2'                              | 2.6897     | Hydrogen Bond | Conventional Hydrogen Bond | P:U18:O2'              | d:Keto-oxime:H          |
| d:Keto-oxime:H - A:THR591:O                             | 1.7369     | Hydrogen Bond | Conventional Hydrogen Bond | A:THR591:O             | d:Keto-oxime:H          |
| d:Keto-oxime:H - A:THR591:O                             | 1.9995     | Hydrogen Bond | Conventional Hydrogen Bond | A:THR591:O             | d:Keto-oxime:H          |
| A:SER592:HA - d:Keto-oxime:O                            | 2.5107     | Hydrogen Bond | Carbon Hydrogen Bond       | A:SER592:HA            | d:Keto-oxime:O          |
| P:U18:H1' - d:Keto-oxime:O                              | 2.4402     | Hydrogen Bond | Carbon Hydrogen Bond       | P:U18:H1'              | d:Keto-oxime:O          |
| T:A14:H4' - d:Keto-oxime:O                              | 3.0799     | Hydrogen Bond | Carbon Hydrogen Bond       | T:A14:H4'              | d:Keto-oxime:O          |
| T:A14:H1' - d:Keto-oxime:O                              | 3.0285     | Hydrogen Bond | Carbon Hydrogen Bond       | T:A14:H1'              | d:Keto-oxime:O          |
| d:Keto-oxime:H12 - P:A19:O2'                            | 2.6305     | Hydrogen Bond | Carbon Hydrogen Bond       | P:A19:O2'              | d:Keto-oxime:H12        |
| A:LYS593:NZ - d:Keto-oxime                              | 4.2440     | Electrostatic | Pi-Cation                  | A:LYS593:NZ            | d:Keto-oxime            |
| T:A14 - d:Keto-oxime                                    | 5.5050     | Hydrophobic   | Pi-Pi T-shaped             | T:A14                  | d:Keto-oxime            |
| A:ALA688 - d:Keto-oxime:C                               | 3.9193     | Hydrophobic   | Alkyl                      | A:ALA688               | d:Keto-oxime:C          |
| d:Keto-oxime:C - A:ILE589                               | 3.9070     | Hydrophobic   | Alkyl                      | A:ILE589               | d:Keto-oxime:C          |
| d:Keto-oxime:C - A:LEU758                               | 4.9149     | Hydrophobic   | Alkyl                      | A:LEU758               | d:Keto-oxime:C          |
| d:Keto-oxime:C - A:ILE589                               | 3.7806     | Hydrophobic   | Alkyl                      | A:ILE589               | d:Keto-oxime:C          |
| d:Keto-oxime:C - A:LEU758                               | 4.5327     | Hydrophobic   | Alkyl                      | A:LEU758               | d:Keto-oxime:C          |
| d:Keto-oxime - A:LYS593                                 | 4.4077     | Hydrophobic   | Pi-Alkyl                   | A:LYS593               | d:Keto-oxime            |
| Interactions: Nsp3_range 207–379-MES-keto-hydroxylamine | Distance Å | Bonding       | Bonding Types              | Binding site of enzyme | Binding site of ligand  |
| B:ASN40:HD22 - d:Keto-hydroxylamine:O                   | 2.0675     | Hydrogen Bond | Conventional Hydrogen Bond | B:ASN40:HD22           | d:Keto-hydroxylamine:O  |
| B:GLY46:HN - d:Keto-hydroxylamine:O                     | 2.1536     | Hydrogen Bond | Conventional Hydrogen Bond | B:GLY46:HN             | d:Keto-hydroxylamine:O  |
| B:VAL49:HN - d:Keto-hydroxylamine:O                     | 2.2900     | Hydrogen Bond | Conventional Hydrogen Bond | B:VAL49:HN             | d:Keto-hydroxylamine:O  |
| B:ALA50:HN - d:Keto-hydroxylamine:O                     | 2.2981     | Hydrogen Bond | Conventional Hydrogen Bond | B:ALA50:HN             | d:Keto-hydroxylamine:O  |
| d:Keto-hydroxylamine:H - B:ALA38:O                      | 1.8839     | Hydrogen Bond | Conventional Hydrogen Bond | B:ALA38:O              | d:Keto-hydroxylamine:H  |
| d:Keto-hydroxylamine:H6 - B:GLY47:O                     | 2.6752     | Hydrogen Bond | Carbon Hydrogen Bond       | B:GLY47:O              | d:Keto-hydroxylamine:H6 |
| B:PHE132 - d:Keto-hydroxylamine                         | 4.8548     | Hydrophobic   | Pi-Pi T-shaped             | B:PHE132               | d:Keto-hydroxylamine    |
| B:PHE132 - d:Keto-hydroxylamine:C                       | 4.9872     | Hydrophobic   | Pi-Alkyl                   | B:PHE132               | d:Keto-hydroxylamine:C  |
| d:Keto-hydroxylamine - B:ALA38                          | 4.0945     | Hydrophobic   | Pi-Alkyl                   | B:ALA38                | d:Keto-hydroxylamine    |

|                                              |                   |                |                            |                               |                               |
|----------------------------------------------|-------------------|----------------|----------------------------|-------------------------------|-------------------------------|
| d:Keto-hydroxylamine - B:ILE131              | 5.4535            | Hydrophobic    | Pi-Alkyl                   | B:ILE131                      | d:Keto-hydroxylamine          |
| <b>Interactions: RdRp-RTP-hydroxyl-oxime</b> | <b>Distance Å</b> | <b>Bonding</b> | <b>Bonding Types</b>       | <b>Binding site of enzyme</b> | <b>Binding site of ligand</b> |
| A:LYS593:HN - d:Hydroxyl-oxime:O             | 2.5103            | Hydrogen Bond  | Conventional Hydrogen Bond | A:LYS593:HN                   | d:Hydroxyl-oxime:O            |
| P:A19:H3 - d:Hydroxyl-oxime:O                | 2.0424            | Hydrogen Bond  | Conventional Hydrogen Bond | P:A19:H3                      | d:Hydroxyl-oxime:O            |
| T:A13:H3 - d:Hydroxyl-oxime:O                | 2.5232            | Hydrogen Bond  | Conventional Hydrogen Bond | T:A13:H3                      | d:Hydroxyl-oxime:O            |
| d:Hydroxyl-oxime:H - A:THR591:O              | 2.4919            | Hydrogen Bond  | Conventional Hydrogen Bond | A:THR591:O                    | d:Hydroxyl-oxime:H            |
| d:Hydroxyl-oxime:H - A:THR591:O              | 3.0054            | Hydrogen Bond  | Conventional Hydrogen Bond | A:THR591:O                    | d:Hydroxyl-oxime:H            |
| A:LYS593:NZ - d:Hydroxyl-oxime               | 3.5954            | Electrostatic  | Pi-Cation                  | A:LYS593:NZ                   | d:Hydroxyl-oxime              |
| A:ALA688 - d:Hydroxyl-oxime:C                | 4.4898            | Hydrophobic    | Alkyl                      | A:ALA688                      | d:Hydroxyl-oxime:C            |
| d:Hydroxyl-oxime:C - A:ILE589                | 4.1574            | Hydrophobic    | Alkyl                      | A:ILE589                      | d:Hydroxyl-oxime:C            |
| d:Hydroxyl-oxime:C - A:LEU758                | 4.6112            | Hydrophobic    | Alkyl                      | A:LEU758                      | d:Hydroxyl-oxime:C            |
| d:Hydroxyl-oxime:C - A:ILE589                | 3.9944            | Hydrophobic    | Alkyl                      | A:ILE589                      | d:Hydroxyl-oxime:C            |
| d:Hydroxyl-oxime:C - A:LEU758                | 4.3221            | Hydrophobic    | Alkyl                      | A:LEU758                      | d:Hydroxyl-oxime:C            |
| d:Hydroxyl-oxime - A:LYS593                  | 4.4437            | Hydrophobic    | Pi-Alkyl                   | A:LYS593                      | d:Hydroxyl-oxime              |

**Table S2.** Best types of interactions and distances of the keto-oxime, keto-hydroxylamine and hydroxyl-oxime tautomers of molnupiravir with Mpro.

| Interactions: Mpro–keto-oxime           | Distance Å | Bonding       | Bonding Types              | Binding site of enzyme | Binding site of ligand   |
|-----------------------------------------|------------|---------------|----------------------------|------------------------|--------------------------|
| A:GLY143:HN - d:Keto-oxime:O            | 2.0634     | Hydrogen Bond | Conventional Hydrogen Bond | A:GLY143:HN            | d:Keto-oxime:O           |
| A:SER144:HN - d:Keto-oxime:O            | 2.5457     | Hydrogen Bond | Conventional Hydrogen Bond | A:SER144:HN            | d:Keto-oxime:O           |
| A:CYS145:HN - d:Keto-oxime:O            | 2.7296     | Hydrogen Bond | Conventional Hydrogen Bond | A:CYS145:HN            | d:Keto-oxime:O           |
| A:HIS163:HE2 - d:Keto-oxime:N           | 1.9378     | Hydrogen Bond | Conventional Hydrogen Bond | A:HIS163:HE2           | d:Keto-oxime:N           |
| d:Keto-oxime:H - A:LEU141:O             | 2.3031     | Hydrogen Bond | Conventional Hydrogen Bond | A:LEU141:O             | d:Keto-oxime:H           |
| d:Keto-oxime:H - A:SER144:OG            | 2.3839     | Hydrogen Bond | Conventional Hydrogen Bond | A:SER144:OG            | d:Keto-oxime:H           |
| d:Keto-oxime:H12 - A:GLN189:OE1         | 2.4764     | Hydrogen Bond | Carbon Hydrogen Bond       | A:GLN189:OE1           | d:Keto-oxime:H12         |
| d:Keto-oxime:C - A:MET165               | 4.6008     | Hydrophobic   | Alkyl                      | A:MET165               | d:Keto-oxime:C           |
| d:Keto-oxime:C - A:MET165               | 4.3516     | Hydrophobic   | Alkyl                      | A:MET165               | d:Keto-oxime:C           |
| A:HIS41 - d:Keto-oxime:C                | 3.7850     | Hydrophobic   | Pi-Alkyl                   | A:HIS41                | d:Keto-oxime:C           |
| d:Keto-oxime - A:CYS145                 | 4.7903     | Hydrophobic   | Pi-Alkyl                   | A:CYS145               | d:Keto-oxime             |
| Interactions: Mpro–keto-hydroxylamine   | Distance Å | Bonding       | Bonding Types              | Binding site of enzyme | Binding site of ligand   |
| A:GLY143:HN - d:Keto-hydroxylamine:O    | 2.0907     | Hydrogen Bond | Conventional Hydrogen Bond | A:GLY143:HN            | d:Keto-hydroxylamine:O   |
| A:HIS163:HE2 - d:Keto-hydroxylamine:O   | 2.2237     | Hydrogen Bond | Conventional Hydrogen Bond | A:HIS163:HE2           | d:Keto-hydroxylamine:O   |
| A:GLU166:HN - d:Keto-hydroxylamine:O    | 1.8749     | Hydrogen Bond | Conventional Hydrogen Bond | A:GLU166:HN            | d:Keto-hydroxylamine:O   |
| d:Keto-hydroxylamine:H - A:LEU141:O     | 2.0278     | Hydrogen Bond | Conventional Hydrogen Bond | A:LEU141:O             | d:Keto-hydroxylamine:H   |
| d:Keto-hydroxylamine:H - A:SER144:OG    | 2.8609     | Hydrogen Bond | Conventional Hydrogen Bond | A:SER144:OG            | d:Keto-hydroxylamine:H   |
| d:Keto-hydroxylamine:H - A:GLU166:O     | 2.1302     | Hydrogen Bond | Conventional Hydrogen Bond | A:GLU166:O             | d:Keto-hydroxylamine:H   |
| A:MET165:HA - d:Keto-hydroxylamine:O    | 2.4746     | Hydrogen Bond | Carbon Hydrogen Bond       | A:MET165:HA            | d:Keto-hydroxylamine:O   |
| d:Keto-hydroxylamine:H5 - A:GLU166:O    | 2.9808     | Hydrogen Bond | Carbon Hydrogen Bond       | A:GLU166:O             | d:Keto-hydroxylamine:H5  |
| d:Keto-hydroxylamine:H11 - A:GLN189:OE1 | 2.7586     | Hydrogen Bond | Carbon Hydrogen Bond       | A:GLN189:OE1           | d:Keto-hydroxylamine:H11 |
| d:Keto-hydroxylamine:H12 - A:GLN189:OE1 | 2.3338     | Hydrogen Bond | Carbon Hydrogen Bond       | A:GLN189:OE1           | d:Keto-hydroxylamine:H12 |
| d:Keto-hydroxylamine:C - A:MET165       | 4.4796     | Hydrophobic   | Alkyl                      | A:MET165               | d:Keto-hydroxylamine:C   |
| d:Keto-hydroxylamine:C - A:MET49        | 3.6485     | Hydrophobic   | Alkyl                      | A:MET49                | d:Keto-hydroxylamine:C   |
| A:HIS41 - d:Keto-hydroxylamin:C         | 4.0395     | Hydrophobic   | Pi-Alkyl                   | A:HIS41                | d:Keto-hydroxylamine:C   |
| A:HIS41 - d:Keto-hydroxylamine:C        | 4.2457     | Hydrophobic   | Pi-Alkyl                   | A:HIS41                | d:Keto-hydroxylamine:C   |
| d:Keto-hydroxylamine - A:CYS145         | 4.9167     | Hydrophobic   | Pi-Alkyl                   | A:CYS145               | d:Keto-hydroxylamine     |
| Interactions: Mpro–hydroxyl-oxime       | Distance Å | Bonding       | Bonding Types              | Binding site of enzyme | Binding site of ligand   |
| A:CYS145:HN - d:Hydroxyl-oxime:O        | 2.6535     | Hydrogen Bond | Conventional Hydrogen Bond | A:CYS145:HN            | d:Hydroxyl-oxime:O       |

|                                  |        |               |                            |             |                    |
|----------------------------------|--------|---------------|----------------------------|-------------|--------------------|
| A:CYS145:HN - d:Hydroxyl-oxime:O | 2.7224 | Hydrogen Bond | Conventional Hydrogen Bond | A:CYS145:HN | d:Hydroxyl-oxime:O |
| d:Hydroxyl-oxime:H - A:LEU141:O  | 2.3179 | Hydrogen Bond | Conventional Hydrogen Bond | A:LEU141:O  | d:Hydroxyl-oxime:H |
| d:Hydroxyl-oxime:H - A:PHE140:O  | 2.4855 | Hydrogen Bond | Conventional Hydrogen Bond | A:PHE140:O  | d:Hydroxyl-oxime:H |
| d:Hydroxyl-oxime:C - A:MET165    | 4.8450 | Hydrophobic   | Alkyl                      | A:MET165    | d:Hydroxyl-oxime:C |
| d:Hydroxyl-oxime:C - A:MET49     | 3.5653 | Hydrophobic   | Alkyl                      | A:MET49     | d:Hydroxyl-oxime:C |
| A:HIS41 - d:Hydroxyl-oxime:C     | 3.6874 | Hydrophobic   | Pi-Alkyl                   | A:HIS41     | d:Hydroxyl-oxime:C |
| A:HIS41 - d:Hydroxyl-oxime:C     | 4.5811 | Hydrophobic   | Pi-Alkyl                   | A:HIS41     | d:Hydroxyl-oxime:C |
| d:Hydroxyl-oxime - A:CYS145      | 4.5139 | Hydrophobic   | Pi-Alkyl                   | A:CYS145    | d:Hydroxyl-oxime   |

---

**Table S3.** Best types of interactions and distances of the keto-oxime, keto-hydroxylamine and hydroxyl-oxime tautomers of molnupiravir with native and mutated Spike protein, RDB.

| Interactions: native Spike protein, RDB–keto-oxime         | Distance Å | Bonding       | Bonding Types              | Binding site of enzyme | Binding site of ligand   |
|------------------------------------------------------------|------------|---------------|----------------------------|------------------------|--------------------------|
| E:THR430:HG1 - :Keto-oxime:O                               | 1.7665     | Hydrogen Bond | Conventional Hydrogen Bond | E:THR430:HG1           | :Keto-oxime:O            |
| E:PHE515:HN - :Keto-oxime:O                                | 2.3622     | Hydrogen Bond | Conventional Hydrogen Bond | E:PHE515:HN            | :Keto-oxime:O            |
| :Keto-oxime:H - E:PHE515:O                                 | 2.6361     | Hydrogen Bond | Conventional Hydrogen Bond | E:PHE515:O             | :Keto-oxime:H            |
| :Keto-oxime:H - E:GLU516:OE1                               | 1.9866     | Hydrogen Bond | Conventional Hydrogen Bond | E:GLU516:OE1           | :Keto-oxime:H            |
| :Keto-oxime:H - E:GLU516:OE1                               | 1.9311     | Hydrogen Bond | Conventional Hydrogen Bond | E:GLU516:OE1           | :Keto-oxime:H            |
| :Keto-oxime:H6 - E:GLU516:OE1                              | 2.8925     | Hydrogen Bond | Carbon Hydrogen Bond       | E:GLU516:OE1           | :Keto-oxime:H6           |
| :Keto-oxime:C - E:PRO463                                   | 4.6505     | Hydrophobic   | Alkyl                      | E:PRO463               | :Keto-oxime:C            |
| E:PHE464 - :Keto-oxime:C                                   | 4.8290     | Hydrophobic   | Pi-Alkyl                   | E:PHE464               | :Keto-oxime:C            |
| E:PHE464 - :Keto-oxime:C                                   | 5.3161     | Hydrophobic   | Pi-Alkyl                   | E:PHE464               | :Keto-oxime:C            |
| Interactions: native Spike protein, RDB–keto-hydroxylamine | Distance Å | Bonding       | Bonding Types              | Binding site of enzyme | Binding site of ligand   |
| E:SER399:HG - :Keto- Hydroxylamine:O                       | 3.0715     | Hydrogen Bond | Conventional Hydrogen Bond | E:SER399:HG            | :Keto- Hydroxylamine:O   |
| :Keto- Hydroxylamine:H - E:GLU340:OE2                      | 2.0541     | Hydrogen Bond | Conventional Hydrogen Bond | E:GLU340:OE2           | :Keto- Hydroxylamine:H   |
| :Keto- Hydroxylamine:H - E:SER399:OG                       | 2.4085     | Hydrogen Bond | Conventional Hydrogen Bond | E:SER399:OG            | :Keto- Hydroxylamine:H   |
| :Keto- Hydroxylamine:H - E:SER399:OG                       | 1.9557     | Hydrogen Bond | Conventional Hydrogen Bond | E:SER399:OG            | :Keto- Hydroxylamine:H   |
| :Keto- Hydroxylamine:H7 - E:ARG346:O                       | 2.8351     | Hydrogen Bond | Carbon Hydrogen Bond       | E:ARG346:O             | :Keto- Hydroxylamine:H7  |
| :Keto- Hydroxylamine:H11 - E:ARG346:O                      | 2.9918     | Hydrogen Bond | Carbon Hydrogen Bond       | E:ARG346:O             | :Keto- Hydroxylamine:H11 |
| E:ASN354:ND2 - :Keto- Hydroxylamine                        | 4.1573     | Hydrogen Bond | Pi-Donor Hydrogen Bond     | E:ASN354:ND2           | :Keto- Hydroxylamine     |
| :Keto- Hydroxylamine:C - E:ARG346                          | 4.3579     | Hydrophobic   | Alkyl                      | E:ARG346               | :Keto- Hydroxylamine:C   |
| :Keto- Hydroxylamine - E:VAL341                            | 4.9488     | Hydrophobic   | Pi-Alkyl                   | E:VAL341               | :Keto- Hydroxylamine     |
| :Keto- Hydroxylamine - E:LYS356                            | 4.7270     | Hydrophobic   | Pi-Alkyl                   | E:LYS356               | :Keto- Hydroxylamine     |
| Interactions: native Spike protein, RDB–hydroxyl-oxime     | Distance Å | Bonding       | Bonding Types              | Binding site of enzyme | Binding site of ligand   |
| :Hydroxyl-oxime:H - E:GLU484:OE1                           | 1.7532     | Hydrogen Bond | Conventional Hydrogen Bond | E:GLU484:OE1           | :Hydroxyl-oxime:H        |
| :Hydroxyl-oxime:H - E:GLU484:OE2                           | 2.1540     | Hydrogen Bond | Conventional Hydrogen Bond | E:GLU484:OE2           | :Hydroxyl-oxime:H        |
| :Hydroxyl-oxime:H - E:GLU484:OE2                           | 1.9856     | Hydrogen Bond | Conventional Hydrogen Bond | E:GLU484:OE2           | :Hydroxyl-oxime:H        |
| E:SER494:HB1 - :Hydroxyl-oxime:O                           | 2.4070     | Hydrogen Bond | Carbon Hydrogen Bond       | E:SER494:HB1           | :Hydroxyl-oxime:O        |
| :Hydroxyl-oxime:H6 - E:GLU484:OE1                          | 2.2942     | Hydrogen Bond | Carbon Hydrogen Bond       | E:GLU484:OE1           | :Hydroxyl-oxime:H6       |
| :Hydroxyl-oxime:H10 - E:PHE490:O                           | 2.6683     | Hydrogen Bond | Carbon Hydrogen Bond       | E:PHE490:O             | :Hydroxyl-oxime:H10      |
| :Hydroxyl-oxime:H10 - E:LEU492:O                           | 2.3591     | Hydrogen Bond | Carbon Hydrogen Bond       | E:LEU492:O             | :Hydroxyl-oxime:H10      |

|                                                                    |                   |                |                            |                               |                               |
|--------------------------------------------------------------------|-------------------|----------------|----------------------------|-------------------------------|-------------------------------|
| :Hydroxyl-oxime:H12 - E:LEU492:O                                   | 2.7154            | Hydrogen Bond  | Carbon Hydrogen Bond       | E:LEU492:O                    | :Hydroxyl-oxime:H12           |
| :Hydroxyl-oxime:C - E:LEU452                                       | 3.9875            | Hydrophobic    | Alkyl                      | E:LEU452                      | :Hydroxyl-oxime:C             |
| :Hydroxyl-oxime:C - E:LEU452                                       | 5.2117            | Hydrophobic    | Alkyl                      | E:LEU452                      | :Hydroxyl-oxime:C             |
| <b>Interactions: mutated Spike protein, RDB-keto-oxime</b>         | <b>Distance Å</b> | <b>Bonding</b> | <b>Bonding Types</b>       | <b>Binding site of enzyme</b> | <b>Binding site of ligand</b> |
| E:GLY431:HN - :Keto-oxime:O                                        | 2.0845            | Hydrogen Bond  | Conventional Hydrogen Bond | E:GLY431:HN                   | :Keto-oxime:O                 |
| :Keto-oxime:H - E:PHE515:O                                         | 2.5983            | Hydrogen Bond  | Conventional Hydrogen Bond | E:PHE515:O                    | :Keto-oxime:H                 |
| :Keto-oxime:H - E:PHE515:O                                         | 3.0184            | Hydrogen Bond  | Conventional Hydrogen Bond | E:PHE515:O                    | :Keto-oxime:H                 |
| :Keto-oxime:H - E:GLU516:OE1                                       | 1.9932            | Hydrogen Bond  | Conventional Hydrogen Bond | E:GLU516:OE1                  | :Keto-oxime:H                 |
| :Keto-oxime:H - E:GLU516:OE1                                       | 2.0186            | Hydrogen Bond  | Conventional Hydrogen Bond | E:GLU516:OE1                  | :Keto-oxime:H                 |
| E:SER514:HA - :Keto-oxime:O                                        | 2.8766            | Hydrogen Bond  | Carbon Hydrogen Bond       | E:SER514:HA                   | :Keto-oxime:O                 |
| :Keto-oxime:H6 - E:GLU516:OE1                                      | 2.8750            | Hydrogen Bond  | Carbon Hydrogen Bond       | E:GLU516:OE1                  | :Keto-oxime:H6                |
| :Keto-oxime:C - E:PRO426                                           | 4.6574            | Hydrophobic    | Alkyl                      | E:PRO426                      | :Keto-oxime:C                 |
| :Keto-oxime:C - E:PRO463                                           | 4.4017            | Hydrophobic    | Alkyl                      | E:PRO463                      | :Keto-oxime:C                 |
| E:PHE464 - :Keto-oxime:C                                           | 4.7589            | Hydrophobic    | Pi-Alkyl                   | E:PHE464                      | :Keto-oxime:C                 |
| E:PHE464 - :Keto-oxime:C                                           | 5.0872            | Hydrophobic    | Pi-Alkyl                   | E:PHE464                      | :Keto-oxime:C                 |
| <b>Interactions: mutated Spike protein, RDB-keto-hydroxylamine</b> | <b>Distance Å</b> | <b>Bonding</b> | <b>Bonding Types</b>       | <b>Binding site of enzyme</b> | <b>Binding site of ligand</b> |
| E:ALA348:HN - :Keto-Hydroxylamine:O                                | 2.1055            | Hydrogen Bond  | Conventional Hydrogen Bond | E:ALA348:HN                   | :Keto-Hydroxylamine:O         |
| E:SER399:HG - :Keto-Hydroxylamine:O                                | 3.0495            | Hydrogen Bond  | Conventional Hydrogen Bond | E:SER399:HG                   | :Keto-Hydroxylamine:O         |
| :Keto-Hydroxylamine:H - E:GLU340:OE2                               | 2.1062            | Hydrogen Bond  | Conventional Hydrogen Bond | E:GLU340:OE2                  | :Keto-Hydroxylamine:H         |
| :Keto-Hydroxylamine:H - E:GLU340:OE2                               | 2.1042            | Hydrogen Bond  | Conventional Hydrogen Bond | E:GLU340:OE2                  | :Keto-Hydroxylamine:H         |
| :Keto-Hydroxylamine:H - E:SER399:OG                                | 1.9616            | Hydrogen Bond  | Conventional Hydrogen Bond | E:SER399:OG                   | :Keto-Hydroxylamine:H         |
| :Keto-Hydroxylamine:H - E:SER399:OG                                | 1.7617            | Hydrogen Bond  | Conventional Hydrogen Bond | E:SER399:OG                   | :Keto-Hydroxylamine:H         |
| :Keto-Hydroxylamine:H8 - E:ARG346:O                                | 2.2937            | Hydrogen Bond  | Carbon Hydrogen Bond       | E:ARG346:O                    | :Keto-Hydroxylamine:H8        |
| :Keto-Hydroxylamine:H11 - E:ARG346:O                               | 1.8321            | Hydrogen Bond  | Carbon Hydrogen Bond       | E:ARG346:O                    | :Keto-Hydroxylamine:H11       |
| E:ALA348 - :Keto-Hydroxylamine:C                                   | 3.9664            | Hydrophobic    | Alkyl                      | E:ALA348                      | :Keto-Hydroxylamine:C         |
| E:ALA348 - :Keto-Hydroxylamine:C                                   | 3.4386            | Hydrophobic    | Alkyl                      | E:ALA348                      | :Keto-Hydroxylamine:C         |
| :Keto-Hydroxylamine - E:VAL341                                     | 4.3749            | Hydrophobic    | Pi-Alkyl                   | E:VAL341                      | :Keto-Hydroxylamine           |
| :Keto-Hydroxylamine - E:ALA344                                     | 5.1236            | Hydrophobic    | Pi-Alkyl                   | E:ALA344                      | :Keto-Hydroxylamine           |
| :Keto-Hydroxylamine - E:LYS356                                     | 4.5973            | Hydrophobic    | Pi-Alkyl                   | E:LYS356                      | :Keto-Hydroxylamine           |
| <b>Interactions: mutated Spike protein, RDB-hydroxyl-oxime</b>     | <b>Distance Å</b> | <b>Bonding</b> | <b>Bonding Types</b>       | <b>Binding site of enzyme</b> | <b>Binding site of ligand</b> |
| :Hydroxyl-oxime:H - E:GLU484:OE1                                   | 1.8041            | Hydrogen Bond  | Conventional Hydrogen Bond | E:GLU484:OE1                  | :Hydroxyl-oxime:H             |



|                                    |        |               |                            |              |                     |
|------------------------------------|--------|---------------|----------------------------|--------------|---------------------|
| :Hydroxyl-oxime:H - E:GLU484:OE1   | 1.8056 | Hydrogen Bond | Conventional Hydrogen Bond | E:GLU484:OE1 | :Hydroxyl-oxime:H   |
| :Hydroxyl-oxime:H - E:GLU484:OE2   | 2.1801 | Hydrogen Bond | Conventional Hydrogen Bond | E:GLU484:OE2 | :Hydroxyl-oxime:H   |
| E:GLN493:HA - :Hydroxyl-oxime:O    | 2.2138 | Hydrogen Bond | Carbon Hydrogen Bond       | E:GLN493:HA  | :Hydroxyl-oxime:O   |
| :Hydroxyl-oxime:H6 - E:GLU484:OE1  | 1.9583 | Hydrogen Bond | Carbon Hydrogen Bond       | E:GLU484:OE1 | :Hydroxyl-oxime:H6  |
| :Hydroxyl-oxime:H11 - E:GLN493:OE1 | 2.4637 | Hydrogen Bond | Carbon Hydrogen Bond       | E:GLN493:OE1 | :Hydroxyl-oxime:H11 |
| :Hydroxyl-oxime:H12 - E:LEU492:O   | 1.8804 | Hydrogen Bond | Carbon Hydrogen Bond       | E:LEU492:O   | :Hydroxyl-oxime:H12 |
| :Hydroxyl-oxime:C - E:LEU452       | 3.9903 | Hydrophobic   | Alkyl                      | E:LEU452     | :Hydroxyl-oxime:C   |
| :Hydroxyl-oxime:C - E:LEU492       | 5.3971 | Hydrophobic   | Alkyl                      | E:LEU492     | :Hydroxyl-oxime:C   |
| E:PHE490 - :Hydroxyl-oxime:C       | 4.4689 | Hydrophobic   | Pi-Alkyl                   | E:PHE490     | :Hydroxyl-oxime:C   |
| E:PHE490 - :Hydroxyl-oxime:C       | 4.6738 | Hydrophobic   | Pi-Alkyl                   | E:PHE490     | :Hydroxyl-oxime:C   |

---
